# Supplementary material
Source: HighWire-hosted journal article supplement (http://www.jrheum.org/highwire/filestream/29649/field_highwire_adjunct_files/0/DataSupplement130815.pdf)
Supplement: DataSupplement130815.pdf [file DataSupplement130815.pdf]

Online supplement to: Worker Productivity Outcome Measures: OMERACT Filter Evidence and Agenda for Future Research

doi:10.3899/jrheum.130815

Supplementary Table 1. Summary of randomized clinical trials applying at-work limitations/productivity (presenteeism) outcome measure(s)

| Primary Author /<br>Year / Trial name     | Patients                          | Comparison<br>(intervention vs. control arms)           | Study Duration | Worker Productivity Outcome Measure |        |     |        |    |       | Additional Notes About<br>Outcome Measure                                                         | Effect Size (between arms)                                                                                                                                                                                                                        |
|-------------------------------------------|-----------------------------------|---------------------------------------------------------|----------------|-------------------------------------|--------|-----|--------|----|-------|---------------------------------------------------------------------------------------------------|---------------------------------------------------------------------------------------------------------------------------------------------------------------------------------------------------------------------------------------------------|
|                                           |                                   |                                                         |                | WPAI                                | WPS-RA | HPQ | WLQ-25 | QQ | Other |                                                                                                   |                                                                                                                                                                                                                                                   |
| Anis (1)<br>2009<br>COMET                 | Early RA<br>(n=205)               | Etanercept + methotrexate vs.<br>methotrexate alone     | 12 months      | X*                                  |        |     | X*     |    |       | Presenteeism estimates were<br>imputed, not directly<br>measured in study                         | Intervention arm had 9.3 (WPAI,<br>statistically significant vs. control arm)<br>and 1.3 (WLQ-25, not significant vs.<br>control arm) fewer lost workdays due to<br>presenteeism over study period                                                |
| Driessen (2)<br>2008<br>Stay@Work Study   | Back, neck pain<br>(n=2076)       | Participatory ergonomics vs.<br>usual practice          | 12 months      |                                     |        | X†  |        |    |       |                                                                                                   | Study protocol published in Driessen<br>2008; results of economic impact (i.e.<br>HPQ) not yet published                                                                                                                                          |
| Emery (ACR<br>abstract)<br>2011<br>OPTIMA | Early RA<br>(n=1032)              | Adalimumab + methotrexate<br>vs. methotrexate + placebo | 26 weeks       | X                                   |        |     |        |    | X     | Other work outcome used<br>was the Work Instability<br>Scale for Rheumatoid<br>Arthritis (RA-WIS) | Mean improvement in WPAI<br>presenteeism score from baseline was<br>21.2 (treatment) vs. 15.3 (control),<br><i>p</i> <0.001<br><br>At follow-up RA-WIS score was 7.5<br>(treatment) vs. 9.0 (control), <i>p</i> <0.01                             |
| IJzelenberg (3)<br>2007                   | LBP or UE<br>disorders<br>(n=489) | Prevention program for LBP<br>vs. usual care            | 12 months      |                                     |        |     |        |    | X     | Total indirect costs (due to<br>absenteeism and<br>presenteeism) were<br>compared                 | Over first 6 months: indirect cost<br>difference of €61 for LBP (ns vs.<br>control), €311 for UE ( <i>p</i> <0.05 vs.<br>control); over next 6 months:<br>indirect cost difference of €344 (in favor<br>of control, ns) for LBP, €122 for UE (ns) |

Online supplement to: Worker Productivity Outcome Measures: OMERACT Filter Evidence and Agenda for Future Research

doi:10.3899/jrheum.130815

|                                      |                                                                      |                                                                                                                                                                     |                                            |                |                                                                                                                                          |                                                                                                                                                                                                                                                                                  |
|--------------------------------------|----------------------------------------------------------------------|---------------------------------------------------------------------------------------------------------------------------------------------------------------------|--------------------------------------------|----------------|------------------------------------------------------------------------------------------------------------------------------------------|----------------------------------------------------------------------------------------------------------------------------------------------------------------------------------------------------------------------------------------------------------------------------------|
| Kavanaugh (4)<br>2009<br>RAPID 1 & 2 | RA<br>(RAPID 1, n=982)<br>(RAPID 2, n=619)                           | Certolizumab pegol (400mg) + metotrexate (treatment arm 1) vs. certolizumab pegol (200mg) + methotrexate (treatment arm 2) vs. placebo + methotrexate (control arm) | 12 months<br>(RAPID 1); 6 months (RAPID 2) | X              | Presenteeism item from WPS-RA: rating of arthritis interference with work productivity (0 = no interference, 10 = complete interference) | RAPID 1 (at week 52): mean presenteeism = 2.4 (treatment arm 1) and 2.4 (treatment arm 2); both $p < 0.05$ vs. control arm (mean=5.2); (+) RAPID 2 (at week 24): mean presenteeism = 2.5 (treatment arm 1) and 3.0 (treatment arm 2); both $p < 0.05$ vs. control arm (mean=5.2) |
| Kimball (5)<br>2011<br>REVEAL        | Psoriasis<br>(n=224 with PsA)<br>(n=94 with other form of arthritis) | Adalimumab vs. placebo                                                                                                                                              | 16 weeks                                   | X              | Total work productivity impairment (TWPI) calculated from WPAI (combining estimates of absenteeism and presenteeism)                     | PsA subgroup: TWPI improved by 15.6 (intervention) vs. deteriorated by 1.4 (control) ( $p < 0.001$ ); Arthritis subgroup: TWPI improved by 12.8 (intervention) vs. 0.1 (control) ( $p = 0.01$ )                                                                                  |
| MacDermid (6)<br>2006                | Rotator cuff tears<br>(n=250)                                        | Arthroscopic or mini-open surgical repair                                                                                                                           | 24 months                                  | X <sup>†</sup> | Work Limitations 26 (variant of WLQ-25)                                                                                                  | N/A – protocol only                                                                                                                                                                                                                                                              |
| Martimo (7)<br>2010                  | Upper-extremity disorders, employed<br>(n=177)                       | Ergonomic intervention vs. no intervention                                                                                                                          | 12 weeks                                   | X              | At-work productivity loss estimated based on a specific formula combining quantity and quality scores                                    | At-work productivity loss differed ( $p < 0.01$ ) between groups based on generalized estimating equation (controlled for covariates)                                                                                                                                            |
| Osterhaus (8)<br>2009<br>FAST4WARD   | RA<br>(n=220)                                                        | Certolizumab pegol vs. placebo                                                                                                                                      | 24 weeks                                   | X              |                                                                                                                                          | Comparisons between ACR20 responders/non-responders were reported (not by intervention arms): SRM of 1.1 among ACR20 responders; SRM of 0.01 among ACR20 non-responders                                                                                                          |
| Rauck (9)<br>2007                    | Chronic moderate to severe LBP<br>(n=392)                            | Opioids: AVINZA (morphine sulphate) vs. OxyContin (no control group)                                                                                                | 6 months                                   | X              |                                                                                                                                          | No significant differences in any of 4 WLQ subscales between arms.                                                                                                                                                                                                               |
| Santos (10)<br>2011                  | Healthy<br>(n=101)                                                   | Educational program for primary prevention vs. general health education                                                                                             | 26 weeks                                   | X              |                                                                                                                                          | No statistical difference in any of 4 WLQ subscales or index score between arms                                                                                                                                                                                                  |
| Skljarevski (11)<br>2010             | Chronic LBP<br>(n=401)                                               | Duloxetine vs. placebo                                                                                                                                              | 12 weeks                                   | X              |                                                                                                                                          | No statistical difference on presenteeism component between arms                                                                                                                                                                                                                 |

Online supplement to: Worker Productivity Outcome Measures: OMERACT Filter Evidence and Agenda for Future Research

doi:10.3899/jrheum.130815

|                     |               |                                             |          |      |        |     |        |    |       |                                                                                                                                                        |                                                                                                                                                                    |
|---------------------|---------------|---------------------------------------------|----------|------|--------|-----|--------|----|-------|--------------------------------------------------------------------------------------------------------------------------------------------------------|--------------------------------------------------------------------------------------------------------------------------------------------------------------------|
| Strand (12)<br>1999 | RA<br>(n=482) | Leflunomide vs. methotrexate<br>vs. placebo | 52 weeks |      |        |     | X      |    |       | Work Limitations<br>Questionnaire of the<br>National Opinion Research<br>Center Survey (0 – 100,<br>100= higher productivity at<br>home, school, work) | Leflunomide arm: mean change of 9.8<br>(p<0.0001 vs. placebo); methotrexate<br>arm: mean change of 7.5 (p<0.05 vs.<br>placebo); placebo arm: mean change of<br>0.3 |
|                     |               |                                             | Total    | 3    | 2      | 0   | 3      | 2  | --    |                                                                                                                                                        |                                                                                                                                                                    |
|                     |               |                                             |          | WPAI | WPS-RA | HPQ | WLQ-25 | QQ | Other |                                                                                                                                                        |                                                                                                                                                                    |

WPAI, Work Productivity and Activity Impairment Questionnaire; WPS-RA, Rheumatoid Arthritis-specific Work Productivity Survey; HPQ, World Health Organization Health and Work Performance Questionnaire; WLQ-25, Work Limitations Questionnaire - 25; QQ, Quantity and Quality method; RA-WIS, Work Instability Scale for Rheumatoid Arthritis; RA, rheumatoid arthritis; PsA, psoriatic arthritis, AS, ankylosing spondylitis; LBP, low back pain; UE, upper-extremity; VAS, visual analog scale; ACR20, American College of Rheumatology 20 response criteria; SRM, standardized response means. \*excluded from total count because worker productivity outcomes were imputed because results not yet available.

Online supplement to: Worker Productivity Outcome Measures: OMERACT Filter Evidence and Agenda for Future Research

doi:10.3899/jrheum.130815

Supplementary Table 2. Highlights of key OMERACT filter evidence for candidate measures of at-work limitations/productivity (presenteeism)

| Instrument                                                                                                                                              | OMERACT Truth                                                                                                                                                         |                                                                                                                                                                                                                                                                                                                                                                                                                                                                                                | OMERACT Discrimination                                                                                                                                            |                                                                                                                                                                                 |                                                                                                                                                                                                                                                                                                                                                                               | OMERACT Feasibility                                                                                                                                         |                                                                                                                                                                                                                                                                                                         |
|---------------------------------------------------------------------------------------------------------------------------------------------------------|-----------------------------------------------------------------------------------------------------------------------------------------------------------------------|------------------------------------------------------------------------------------------------------------------------------------------------------------------------------------------------------------------------------------------------------------------------------------------------------------------------------------------------------------------------------------------------------------------------------------------------------------------------------------------------|-------------------------------------------------------------------------------------------------------------------------------------------------------------------|---------------------------------------------------------------------------------------------------------------------------------------------------------------------------------|-------------------------------------------------------------------------------------------------------------------------------------------------------------------------------------------------------------------------------------------------------------------------------------------------------------------------------------------------------------------------------|-------------------------------------------------------------------------------------------------------------------------------------------------------------|---------------------------------------------------------------------------------------------------------------------------------------------------------------------------------------------------------------------------------------------------------------------------------------------------------|
|                                                                                                                                                         | Face/Content Validity                                                                                                                                                 | Construct validity                                                                                                                                                                                                                                                                                                                                                                                                                                                                             | Reliability & Internal Consistency (if applicable)                                                                                                                | Responsiveness (within-group discrimination)                                                                                                                                    | RCT (between-group discrimination)                                                                                                                                                                                                                                                                                                                                            |                                                                                                                                                             | Score Interpretability                                                                                                                                                                                                                                                                                  |
|                                                                                                                                                         | (e.g. patient involvement in development; positive evaluation or endorsement of content from experts/patients)                                                        | (e.g. expected level of correlations with similar constructs (or longitudinal change); known-group differences consistent with expectations)                                                                                                                                                                                                                                                                                                                                                   | (e.g. score agreement between test-retest (ICCs >0.7); Cronbach's alpha or KR-20 >0.7)                                                                            | (e.g. ES or SRM estimates consistent with degree of change observed; high correlation with relevant external indicator of change or AUC>0.7)                                    | (e.g. significant between-group difference (where intervention efficacy expected))                                                                                                                                                                                                                                                                                            | (e.g. cut-score estimates associated with Patient Acceptable State or Minimal Important Difference)                                                         | (e.g. evidence of low respondent and administration burden, considering time, cost, accessibility of measure)                                                                                                                                                                                           |
| <b>Global measures</b>                                                                                                                                  |                                                                                                                                                                       |                                                                                                                                                                                                                                                                                                                                                                                                                                                                                                |                                                                                                                                                                   |                                                                                                                                                                                 |                                                                                                                                                                                                                                                                                                                                                                               |                                                                                                                                                             |                                                                                                                                                                                                                                                                                                         |
| Work Productivity Activity Impairment (WPAI, item 5) \$<br><br>assesses the extent to which health condition affected productivity while working (0-10) | Items generated from cognitive debriefing of patients with allergic rhinitis (13)<br><br>Included in several literature reviews of work productivity measures (14-17) | Moderate correlation ( $r=0.39$ ) with HLQ presenteeism score; moderate-to-high correlations ( $r=0.67-0.77$ ) against a series of health status indicators (function, pain, patient globals) in RA (18)<br><br>Moderate correlations with QQ method ( $r=0.61$ ) and HLQ presenteeism score ( $r=0.48$ ) in RA; moderately comparable cost difference per week due to presenteeism between RA and control groups were estimated from WPAI-GH (€200), QQ (€152) and HLQ (€57) approaches. (19) | ICC <sub>2,1</sub> of 0.84 among workers with IA or OA over 2 week test-retest (preliminary results from CAN-funded "discrimination" study)<br><br>See also: (13) | In a 24-week adalimumab RCT in AS: SRM of -0.89 to -0.86 were found among clinical responders ; SRM of -0.52 to -0.46 were found among non-responders (21)<br><br>See also: (5) | Significant difference in the change in presenteeism global from WPAI:SpA between clinical responders vs. non-responders over 24 weeks in a RCT of adalimumab in AS (21)<br><br>Mean improvement in WPAI presenteeism global was 21.2 (adalimumab + methotrexate arm) vs. 15.3 (methotrexate + placebo arm), $p<0.001$ , in a 26 week trial in early RA (22)<br><br>See also: | PAS cut-points estimated among workers with AS (23)<br><br>Study initiated by working group in progress, PAS/MID cut-score estimates available from authors | Single item; easy to administer/score<br><br>Various versions of WPAI accessible from developer's website<br><br>Can be adapted to be applied to various occupations/health conditions; various languages<br><br>Self-administration may lead to more missing data than interviewer-administration (13) |

Online supplement to: Worker Productivity Outcome Measures: OMERACT Filter Evidence and Agenda for Future Research

doi:10.3899/jrheum.130815

|                                                                                                                                                                   |                                                                                                                                                                                                                        |                                                                                                                                                                                                                           |                                                                                                                                             |                                                                                                                                                                                                                                |                                                                                                                                                                                                                                                                                                                                                                                                                                                                                                                                                                        |                                                                                                  |                                                                                                                                                   |
|-------------------------------------------------------------------------------------------------------------------------------------------------------------------|------------------------------------------------------------------------------------------------------------------------------------------------------------------------------------------------------------------------|---------------------------------------------------------------------------------------------------------------------------------------------------------------------------------------------------------------------------|---------------------------------------------------------------------------------------------------------------------------------------------|--------------------------------------------------------------------------------------------------------------------------------------------------------------------------------------------------------------------------------|------------------------------------------------------------------------------------------------------------------------------------------------------------------------------------------------------------------------------------------------------------------------------------------------------------------------------------------------------------------------------------------------------------------------------------------------------------------------------------------------------------------------------------------------------------------------|--------------------------------------------------------------------------------------------------|---------------------------------------------------------------------------------------------------------------------------------------------------|
|                                                                                                                                                                   |                                                                                                                                                                                                                        | Moderately correlated with ASQOL (r=0.60), SF-36 PCS (r=-0.67), SF-36 RP (r=-0.48) (20)                                                                                                                                   |                                                                                                                                             |                                                                                                                                                                                                                                | (1;5;11)                                                                                                                                                                                                                                                                                                                                                                                                                                                                                                                                                               |                                                                                                  |                                                                                                                                                   |
| Property Summary rating                                                                                                                                           | Face/Content Validity<br>++                                                                                                                                                                                            | Construct validity<br>++                                                                                                                                                                                                  | Reliability (& IC)<br>+                                                                                                                     | Responsiveness<br>++                                                                                                                                                                                                           | RCT<br>++                                                                                                                                                                                                                                                                                                                                                                                                                                                                                                                                                              | Interpretability<br>+                                                                            | Feasibility<br>++                                                                                                                                 |
| Rheumatoid Arthritis-specific Work Productivity Survey (WPS-RA, item 4) \$<br><br>Assesses the extent to which arthritis interfered with work productivity (0-10) | Developed through a literature review on worker productivity associated with RA or other chronic health conditions (8)<br><br>Included in recent literature review of worker productivity measure in rheumatology (17) | Known-group comparisons found rate of arthritis interference on work productivity differed (p<0.01) among persons with RA stratified by HAQ-DI, SF-36 PCS, or SF-36 MCS scores (≤ first quartile vs. ≥third quartile) (8) | ICC <sub>2,1</sub> of 0.87 among workers with IA or OA over 2 week test-retest (preliminary results from CAN-funded “discrimination” study) | In a 24-week trial of certolizumab in RA, SRM of 1.10 and 0.01 were found among ACR20 responders and non-responders respectively; SRM of 1.12 and 0.03 were found among HAQ-DI responders and non-responders, respectively (8) | Significant difference in mean change in WPS-RA global between ACR20 responders vs. non-responders (P<0.01) as well as between HAQ-DI responder vs. non-responder (P≤0.001) in a 24 week trial of certolizumab in RA (FAST 4WARD study) (8)<br><br>Significant difference in WPS-RA global were found (P≤0.05) between treatment arm(s) (certolizumab + methotrexate) and control arm (placebo + methotrexate) in two separate trials in RA (RAPID 1, 24 weeks; RAPID 2, 52 weeks) (4)<br><br>Significant difference in mean change of WPS-RA global was found between | Study initiated by working group in progress, PAS/MID cut-score estimates available from authors | Single-item, low burden<br><br>Accessible on the web; permission to use required<br><br>Low frequencies of missing data (0% of n=85) with RA; (8) |

Online supplement to: Worker Productivity Outcome Measures: OMERACT Filter Evidence and Agenda for Future Research

doi:10.3899/jrheum.130815

|                                                                                                                                                              |                                                                                                                                               |                                                                                                                                                                                                                                                                                                                                                                                                                                          |                                                                                                                                                                   |                                    |                                                                                                                                                             |                                                                                                  |                                                                                                                                                                                               |
|--------------------------------------------------------------------------------------------------------------------------------------------------------------|-----------------------------------------------------------------------------------------------------------------------------------------------|------------------------------------------------------------------------------------------------------------------------------------------------------------------------------------------------------------------------------------------------------------------------------------------------------------------------------------------------------------------------------------------------------------------------------------------|-------------------------------------------------------------------------------------------------------------------------------------------------------------------|------------------------------------|-------------------------------------------------------------------------------------------------------------------------------------------------------------|--------------------------------------------------------------------------------------------------|-----------------------------------------------------------------------------------------------------------------------------------------------------------------------------------------------|
|                                                                                                                                                              |                                                                                                                                               |                                                                                                                                                                                                                                                                                                                                                                                                                                          |                                                                                                                                                                   |                                    | clinical responders vs. non-responders ( $P \leq 0.01$ ) after 12 week treatment with certolizumab in RA (data pooled from RAPID 1 and RAPID 2 trials) (24) |                                                                                                  |                                                                                                                                                                                               |
| Property Summary rating                                                                                                                                      | Face/Content Validity<br>+                                                                                                                    | Construct validity<br>+                                                                                                                                                                                                                                                                                                                                                                                                                  | Reliability (& IC)<br>+                                                                                                                                           | Responsiveness<br>++               | RCT<br>++                                                                                                                                                   | Interpretability<br>(+)                                                                          | Feasibility<br>++                                                                                                                                                                             |
| Health and Work Productivity Questionnaire (HPQ, item A12) \$<br><br>Self-rating of overall work performance on working days over past 7 (or 28) days (0-10) | Developed with support from the World Health Organization<br><br>Included in recent literature reviews of worker productivity measure (14;15) | Lost-hour estimated from HPQ global showed moderate agreement (ICC=0.61) with estimates from WPAI global and low agreement with WLQ-Index (ICC=0.26) and Health Labor Questionnaire (ICC=0.16) among workers with arthritis. (18)<br><br>Moderate correlations with WALS ( $r=-0.45$ ), SPS-6 ( $r=-0.49$ ), EWPS ( $r=-0.62$ ), RA-WIS ( $r=-0.56$ ), WLQ-25 ( $r=-0.49$ ) among workers with arthritis (25)<br><br>See also: (26) (27) | ICC <sub>2,1</sub> of 0.83 among workers with IA or OA over 2 week test-retest (preliminary results from CAN-funded “discrimination” study)<br><br>See also: (26) | No evidence of achievement to-date | No evidence of achievement to date                                                                                                                          | Study initiated by working group in progress, PAS/MID cut-score estimates available from authors | Low burden; global measure of presenteeism consists of 1 item (A12), can be used in conjunction with item A10 from HPQ to calculate relative presenteeism (28)<br><br>Accessible from the web |
| Property Summary rating                                                                                                                                      | Face/Content Validity<br>++                                                                                                                   | Construct validity<br>++                                                                                                                                                                                                                                                                                                                                                                                                                 | Reliability (& IC)<br>(+)                                                                                                                                         | Responsiveness<br>?                | RCT<br>?                                                                                                                                                    | Interpretability<br>(+)                                                                          | Feasibility<br>++                                                                                                                                                                             |
| Quantity & Quality Method (QQ) \$                                                                                                                            | Developed by experts in the field                                                                                                             | Moderate correlations with presenteeism scores from the WPAI-GH ( $r=0.61$ ) and the                                                                                                                                                                                                                                                                                                                                                     | ICC <sub>2,1</sub> of 0.77 among workers with IA or OA over 2 week test-retest                                                                                    | No evidence of achievement to-date | Significant difference in at-work productivity loss estimated by QQ method                                                                                  | Cut-scores associated with Patient Acceptable                                                    | Low burden, QQ consists of two items from the Productivity and Disease                                                                                                                        |

Online supplement to: Worker Productivity Outcome Measures: OMERACT Filter Evidence and Agenda for Future Research

doi:10.3899/jrheum.130815

|                                                                                                           |                                                                                                                                                      |                                                                                                                                                                                                                                                                                                                                                                                                                                                            |                                                                                                                                                 |                                                                                                                                                                                                                                                                                                                                                     |                                                                                                                                                          |                                                                                                                                                              |                                                                                     |
|-----------------------------------------------------------------------------------------------------------|------------------------------------------------------------------------------------------------------------------------------------------------------|------------------------------------------------------------------------------------------------------------------------------------------------------------------------------------------------------------------------------------------------------------------------------------------------------------------------------------------------------------------------------------------------------------------------------------------------------------|-------------------------------------------------------------------------------------------------------------------------------------------------|-----------------------------------------------------------------------------------------------------------------------------------------------------------------------------------------------------------------------------------------------------------------------------------------------------------------------------------------------------|----------------------------------------------------------------------------------------------------------------------------------------------------------|--------------------------------------------------------------------------------------------------------------------------------------------------------------|-------------------------------------------------------------------------------------|
| Assesses the quantity and quality of work performed compared to normal ( 2 items, 0-10)                   |                                                                                                                                                      | Health Labor Questionnaire ( $r=0.34$ ); Moderately comparable difference in costs per week due to presenteeism between RA and control groups were estimated from QQ (€152), WPAI-GH (€200), and HLQ (€57) approaches (19)<br><br>See also: (29)                                                                                                                                                                                                           | (preliminary results from CAN-funded “discrimination” study)                                                                                    |                                                                                                                                                                                                                                                                                                                                                     | between intervention and control arm ( $p=0.013$ ) in a RCT of ergonomic intervention in workers with upper-extremity disorders (7)<br><br>See also: (3) | Work State were estimated among workers with AS (23)<br><br>Study initiated by working group in progress, PAS/MID cut-score estimates available from authors | Questionnaire (PRODISQ) (29)<br><br>Accessible from the web                         |
| Property<br>Summary rating                                                                                | Face/Content Validity<br>+                                                                                                                           | Construct validity<br>+                                                                                                                                                                                                                                                                                                                                                                                                                                    | Reliability (& IC)<br>(+)                                                                                                                       | Responsiveness<br>?                                                                                                                                                                                                                                                                                                                                 | RCT<br>+                                                                                                                                                 | Interpretability<br>+                                                                                                                                        | Feasibility<br>++                                                                   |
| Work Ability Index (WAI, item 1)<br><br>Assesses current work ability in relation to lifetime best (0-10) | Developed by the Finish Institute of Occupational Health (30)<br><br>Widely applied in occupational health research, especially in European contexts | WAI global showed low-to-moderate Pearson $r$ with carrying and lifting test (0.13), lower lifting strength test (0.20), and upper lifting strength test (0.40) among construction workers with musculoskeletal disorders (31)<br><br>Among workers with RA, fatigue (OR=24), lack of autonomy (OR=3.7), lack of supervisor support (OR=3.6), lack of co-worker support (OR=6), high physical requirements (OR=4.3-24) were associated with lower WAI (32) | ICC <sub>2,1</sub> of 0.80 among workers with IA or OA over 2 week test-retest (preliminary results from CAN-funded “discrimination” DAP study) | Significant improvements in WAI global score (11%) after 1 year course of adalimumab in RA; SRM (0-6 months) = 0.34, SRM (0-12 months) = 0.41 (34)<br><br>Significant improvement in WAI global score (10%) after 6 month course of tumor necrosis factor inhibitor in RA; SRM = -0.48 among those working, SRM = 0.19 among those not working (35) | No evidence of achievement to-date                                                                                                                       | Study initiated by working group in progress, PAS/MID cut-score estimates available from authors                                                             | Low burden to complete and score the measure<br><br>Accessible on-line; free to use |

Online supplement to: Worker Productivity Outcome Measures: OMERACT Filter Evidence and Agenda for Future Research

doi:10.3899/jrheum.130815

|                                                                                            |                                                                                                                                                                                                                                         |                                                                                                                                                                                                                                                                                                                                                                                                                                                                    |                                                                                                                                                                                                                                                                                                                                                    |                                                                                                                                                |                                    |                                                                                                  |                                                                                                                                                                                                                                                  |
|--------------------------------------------------------------------------------------------|-----------------------------------------------------------------------------------------------------------------------------------------------------------------------------------------------------------------------------------------|--------------------------------------------------------------------------------------------------------------------------------------------------------------------------------------------------------------------------------------------------------------------------------------------------------------------------------------------------------------------------------------------------------------------------------------------------------------------|----------------------------------------------------------------------------------------------------------------------------------------------------------------------------------------------------------------------------------------------------------------------------------------------------------------------------------------------------|------------------------------------------------------------------------------------------------------------------------------------------------|------------------------------------|--------------------------------------------------------------------------------------------------|--------------------------------------------------------------------------------------------------------------------------------------------------------------------------------------------------------------------------------------------------|
|                                                                                            |                                                                                                                                                                                                                                         | Sick-listed group reported significantly lower WAI (mean=3.1) vs. working group (mean=6.6) among workers with repetitive strain injuries of the upper-limb (33)<br><br>See also: (34) (35) (36;37)                                                                                                                                                                                                                                                                 |                                                                                                                                                                                                                                                                                                                                                    |                                                                                                                                                |                                    |                                                                                                  |                                                                                                                                                                                                                                                  |
| Property<br>Summary rating                                                                 | Face/Content Validity<br>++                                                                                                                                                                                                             | Construct validity<br>++                                                                                                                                                                                                                                                                                                                                                                                                                                           | Reliability (& IC)<br>+                                                                                                                                                                                                                                                                                                                            | Responsiveness<br>++                                                                                                                           | RCT<br>?                           | Interpretability<br>(+)                                                                          | Feasibility<br>++                                                                                                                                                                                                                                |
| <b>Multi-item measures</b>                                                                 |                                                                                                                                                                                                                                         |                                                                                                                                                                                                                                                                                                                                                                                                                                                                    |                                                                                                                                                                                                                                                                                                                                                    |                                                                                                                                                |                                    |                                                                                                  |                                                                                                                                                                                                                                                  |
| Workplace Activity Limitations Scale (WALS)<br><br>Assesses workplace activity limitations | 70% of 250 workers with arthritis endorsed the scale's comprehensiveness; and 32.6% preferred the WALS over 4 other work measures (38)<br><br>Included in recent literature reviews of worker productivity measure in rheumatology (17) | High correlation with RA-WIS (r=0.77) among workers with RA or OA;<br>Moderate correlations with self-related ability to work (r=-0.58) and self-rated difficulty doing work (r=0.66) (25)<br><br>Moderate correlation (Pearson r=0.61) between WALS and Chronic Illness Job Strain Scale (39)<br><br>Known-group differences: high WALS (>9) more likely to require work accommodation, experience work absenteeism, and job interruptions vs. low WALS (<5) (40) | ICC <sub>2,1</sub> of 0.93 among workers with IA or OA over 2 week test-retest (preliminary results from CAN-funded "discrimination" study)<br><br>Cronbach's alpha of 0.87 among workers with RA or OA (25)<br><br>Cronbach's alpha of 0.78-0.81 (n=349-491) with OA or IA over 4 time-points, each 18 months apart (41-43)<br><br>See also: (39) | SRM=-0.79 among those 1-year improvement in self-rated work ability; SRM=0.50 among those 1-year deterioration in self-rated work ability (25) | No evidence of achievement to-date | Study initiated by working group in progress, PAS/MID cut-score estimates available from authors | 97.6% of 250 workers with arthritis endorsed the scale's understandability and 77.6% endorsed the appropriateness of its length (38)<br><br>94% of n=250 workers with RA or OA completed ≥10/11 scale items; reflects low respondent burden (25) |

Online supplement to: Worker Productivity Outcome Measures: OMERACT Filter Evidence and Agenda for Future Research

doi:10.3899/jrheum.130815



| Property Summary rating                                                                                                                                                                 | Face/Content Validity<br>++                                                                                                                                                                                                                                                                                                                                                                                                                                                                                         | Construct validity<br>++                                                                                                                                                                                                                                                                                                                                                                                                                                                                                                                                                                             | Reliability (& IC)<br>++                                                                                                                                                                                                                                                                                                                                                       | Responsiveness<br>+                                                                                                                                                                   | RCT<br>?                                                                 | Interpretability<br>(+)                                                                                                                                            | Feasibility<br>++                                                                                                                                                                                                                                                                                                                                                                                                                                                  |
|-----------------------------------------------------------------------------------------------------------------------------------------------------------------------------------------|---------------------------------------------------------------------------------------------------------------------------------------------------------------------------------------------------------------------------------------------------------------------------------------------------------------------------------------------------------------------------------------------------------------------------------------------------------------------------------------------------------------------|------------------------------------------------------------------------------------------------------------------------------------------------------------------------------------------------------------------------------------------------------------------------------------------------------------------------------------------------------------------------------------------------------------------------------------------------------------------------------------------------------------------------------------------------------------------------------------------------------|--------------------------------------------------------------------------------------------------------------------------------------------------------------------------------------------------------------------------------------------------------------------------------------------------------------------------------------------------------------------------------|---------------------------------------------------------------------------------------------------------------------------------------------------------------------------------------|--------------------------------------------------------------------------|--------------------------------------------------------------------------------------------------------------------------------------------------------------------|--------------------------------------------------------------------------------------------------------------------------------------------------------------------------------------------------------------------------------------------------------------------------------------------------------------------------------------------------------------------------------------------------------------------------------------------------------------------|
| <p>Work Limitations Questionnaire (WLQ-25) \$</p> <p>Assesses work role functioning over 4 domains of work: time-management, physical demands, mental-interpersonal, output-demands</p> | <p>Content and format developed from focus groups and cognitive interviewing with workers with various chronic conditions (non-arthritis); domain organization derived from psychometric testing in persons with rheumatoid arthritis, chronic headaches, and epilepsy (44)</p> <p>92.8% of 250 workers endorsed the scale's comprehensiveness and 30.0% considered as preferred measure over 4 other work measures (38)</p> <p>Included in recent literature reviews of worker productivity measure (14-17;45)</p> | <p>Moderate-to-high correlation with RA-WIS (<math>r=0.67</math>) and WALS (<math>r=0.61</math>) among worker with RA or OA; moderate correlation (<math>r=-0.49</math>) with self-rated work productivity (25)</p> <p>Low-to-moderate correlations with the SF-36 MCS (<math>r=-0.60</math>), SF-36 PCS (<math>r=-0.49</math>), fatigue VAS (<math>r=0.50</math>), pain VAS (<math>r=0.46</math>); HAQ (<math>r=0.56</math>), HAQ-II (<math>r=0.54</math>), days with limited activities (<math>r=0.38</math>), and days unable to work (<math>r=0.29</math>)(46)</p> <p>See also: (44) (46-48)</p> | <p>ICC<sub>2,1</sub> range of 0.79-0.93 (subscales and Index score) among workers with IA or OA over 2 week test-retest (preliminary results from CAN-funded "discrimination" DAP study)</p> <p>In OA, Cronbach's alpha range of 0.93-0.97 for 4 subscales (49) (Lerner 2002)</p> <p>In RA, Cronbach's alpha range of 0.83-0.88 for 4 subscales (46)</p> <p>See also: (25)</p> | <p>SRM=-0.64 among those 1-year improvement in self-rated work productivity; SRM=0.08 among those 1-year deterioration in self-rated work productivity (lower than expected) (25)</p> | <p>Several RCT showed no effect between groups, see:<br/>(6;9;10;12)</p> | <p>PAS cut-points estimated among workers with AS (23)</p> <p>Study initiated by working group in progress, PAS/MID cut-score estimates available from authors</p> | <p>78.6% of 250 workers with arthritis endorsed the scale's understandability and 79.9% endorsed the appropriateness of its length (38)</p> <p>Minimal missing data (&lt;1%) when applied in OA (49)</p> <p>Missing proportion of 3.1 – 21.8% for individual scale items (46)</p> <p>Reverse orientation of instructions in the PD subscale compared to other 3 subscales could be a source of confusion for respondents (a non-issue with the adapted WLQ-25)</p> |
| Property Summary rating                                                                                                                                                                 | Face/Content Validity<br>++                                                                                                                                                                                                                                                                                                                                                                                                                                                                                         | Construct validity<br>++                                                                                                                                                                                                                                                                                                                                                                                                                                                                                                                                                                             | Reliability (& IC)<br>++                                                                                                                                                                                                                                                                                                                                                       | Responsiveness<br>+                                                                                                                                                                   | RCT<br>-                                                                 | Interpretability<br>+                                                                                                                                              | Feasibility<br>++                                                                                                                                                                                                                                                                                                                                                                                                                                                  |

Full details of OMERACT filter evidence for all measures available from authors

SRM, standardized response means; PAS, patient acceptable state; MID, minimal important difference; HAQ-DI, health assessment questionnaire disability index; ACR20, American College of Rheumatology Criteria 20; SF-36 PCS, Medical Outcome Studies Short-Form 36 Physical Component Summary score; SF36 MCS, Medical Outcome Studies Short-From 36 Mental Component Summary score; HLQ, Health Labour Questionnaire, CAN, Canadian Arthritis Network.

\$ instrument has potential for use in economic evaluations

Online supplement to: Worker Productivity Outcome Measures: OMERACT Filter Evidence and Agenda for Future Research

doi:10.3899/jrheum.130815

Ratings (based on overall appraisal of all available evidence in arthritis or musculoskeletal conditions):

For construct validity, reliability, and responsiveness

++ = evidence of this measurement property from 2 or more studies, in the absence of conflicting evidence

+ = evidence of this measurement property from at least 1 study, and overall body of evidence supporting >refuting

+/- = conflicting evidence available, current evidence does not meet ++ or +

- = only negative evidence available

? = no evidence available

For RCT

++ = 2 or more RCT providing evidence of discrimination (required for OMERACT endorsement)

+ = 1 RCT providing evidence of discrimination

(+) = ongoing RCT using worker productivity outcome measure (protocol available)

- = only evidence of lack of discrimination available

? = no RCT available

*discrimination = includes between-group differences of within-group change, or between-group differences of final state*

For score interpretability

++ = estimates available from 2 or more studies

+ = estimates available from 1 study

(+) = estimates expected from an ongoing study

? = not yet available

Online supplement to: Worker Productivity Outcome Measures: OMERACT Filter Evidence and Agenda for Future Research

doi:10.3899/jrheum.130815

## REFERENCES

- (1) Anis A, Zhang W, Emery P, Sun H, Singh A, Freundlich B et al. The effect of etanercept on work productivity in patients with early active rheumatoid arthritis: results from the COMET study. *Rheumatology* 2009; 48(10):1283-9.
- (2) Driessen MT, Anema JR, Proper KI, Bongers PM, van der Beek AJ. Stay@Work: Participatory Ergonomics to prevent low back and neck pain among workers: design of a randomised controlled trial to evaluate the (cost-)effectiveness. *BMC Musculoskel Dis* 2008; 9(145).
- (3) IJzelenberg H, Meerding WJ, Burdorf A. Effectiveness of a back pain prevention program: a cluster randomized controlled trial in an occupational setting. *Spine* 2007; 32(7):711-9.
- (4) Kavanaugh A, Smolen JS, Emery P, Purcaru O, Keystone E, Richard L et al. Effect of certolizumab pegol with methotrexate on home and work place productivity and social activities in patients with active rheumatoid arthritis.[Erratum appears in *Arthritis Rheum*. 2010 Oct;62(10):1514]. *Arthritis Rheum* 2009; 61(11):1592-600.
- (5) Kimball AB, Bensimon AG, Guerin A, Yu AP, Wu EQ, Okun MM et al. Efficacy and safety of adalimumab among patients with moderate to severe psoriasis with co-morbidities: Subanalysis of results from a randomized, double-blind, placebo-controlled, phase III trial. *Am J of Clin Dermatol* 2011; 12(1):51-62.
- (6) MacDermid JC, Holtby R, Razmjou H, Bryant D, JOINTS C. All-arthroscopic versus mini-open repair of small or moderate-sized rotator cuff tears: a protocol for a randomized trial [NCT00128076]. *BMC Musculoskel Dis* 2006; 7(25).
- (7) Martimo KP, Shiri R, Miranda H, Ketola R, Varonen H, Viikari-Juntura E. Effectiveness of an ergonomic intervention on the productivity of workers with upper-extremity disorders--a randomized controlled trial. *Scand J Work Environ Health* 2010; 36(1):25-33.
- (8) Osterhaus JT, Purcaru O, Richard L. Discriminant validity, responsiveness and reliability of the rheumatoid arthritis-specific Work Productivity Survey (WPS-RA). *Arthritis Res Ther* 2009; 11(3):R73.
- (9) Rauck RL, Bookbinder SA, Bunker TR, Alftine CD, Gershon S, de Jong E et al. A randomized, open-label, multicenter trial comparing once-a-day AVINZA (morphine sulfate extended-release capsules) versus twice-a-day OxyContin (oxycodone hydrochloride controlled-release tablets) for the treatment of chronic, moderate to severe low back pain: improved physical functioning in the ACTION trial. *J Opioid Manag* 2007; 3(1):35-43.

Online supplement to: Worker Productivity Outcome Measures: OMERACT Filter Evidence and Agenda for Future Research

doi:10.3899/jrheum.130815

- (10) Santos AC, Bredemeier M, Rosa KF, Amantea VA, Xavier RM. Impact on the Quality of Life of an Educational Program for the Prevention of Work-Related Musculoskeletal Disorders: a randomized controlled trial. *BMC Public Health* 2011; 11:60, 2011.
- (11) Skljarevski V, Zhang S, Desai D, Alaka KJ, Palacios S, Miazgowski T et al. Duloxetine versus placebo in patients with chronic low back pain: a 12-week, fixed-dose, randomized, double-blind trial. *J Pain* 2010; 11(12):1282-90.
- (12) Strand V, Tugwell P, Bombardier C, Maetzel A, Crawford B, Dorrier C et al. Function and health-related quality of life: results from a randomized controlled trial of leflunomide versus methotrexate or placebo in patients with active rheumatoid arthritis. Leflunomide Rheumatoid Arthritis Investigators Group. *Arthritis Rheum* 1999; 42(9):1870-8.
- (13) Reilly MC, Zbrozek AS, Dukes EM. The validity and reproducibility of a work productivity and activity impairment instrument. *Pharmacoeconomics* 1993; 4(5):353-65.
- (14) Loeppke R, Hymel PA, Lofland JH, Pizzi LT, Konicki DL, Anstadt GW et al. Health-related workplace productivity measurement: general and migraine-specific recommendations from the ACOEM Expert Panel. *J Occup Environ Med* 2003; 45(4):349-59.
- (15) Prasad M, Wahlqvist P, Shikhar R, Shih YC. A review of self-report instruments measuring health-related work productivity: a patient-reported outcomes perspective. *Pharmacoeconomics* 2004; 22(4):225-44.
- (16) Lynch W, Riedel J. *Measuring employee productivity: A guide to self-assessment tools*. Scottsdale, AZ: Institute for Health & Productivity Management & William Mercer; 2001.
- (17) Tang K, Beaton DE, Boonen A, Gignac MAM, Bombardier C. Measures of work disability and productivity: Rheumatoid Arthritis Specific Work Productivity Survey (WPS-RA), Workplace Activity Limitations Scale (WALS), Work Instability Scale for Rheumatoid Arthritis (RA-WIS), Work Limitations Questionnaire (WLQ), and Work Productivity and Activity Impairment Questionnaire (WPAI). *Arthritis Care Res (Hoboken)* 2011; 63(Suppl 11):S337-S349.
- (18) Zhang W, Bansback N, Boonen A, Young A, Singh A, Anis AH. Validity of the work productivity and activity impairment questionnaire--general health version in patients with rheumatoid arthritis. *Arthritis Res Ther* 2010; 12(5):R177.
- (19) Braakman-Jansen LM, Taal E, Kuper IH, van de Laar MA. Productivity loss due to absenteeism and presenteeism by different instruments in patients with RA and subjects without RA. *Rheumatology (Oxford)* 2012; 51(2):354-61.

Online supplement to: Worker Productivity Outcome Measures: OMERACT Filter Evidence and Agenda for Future Research

doi:10.3899/jrheum.130815

- (20) Maksymowych WP, Gooch KL, Wong RL, Kupper H, van der HD. Impact of age, sex, physical function, health-related quality of life, and treatment with adalimumab on work status and work productivity of patients with ankylosing spondylitis. *J Rheumatol* 2010; 37(2):385-92.
- (21) Reilly MC, Gooch KL, Wong RL, Kupper H, van der HD. Validity, reliability and responsiveness of the Work Productivity and Activity Impairment Questionnaire in ankylosing spondylitis. *Rheumatology* 2010; 49(4):812-9.
- (22) Emery P, Kavanaugh A, Arthur F, Smolen J, Cifaldi M, Chaves L et al. Combination Therapy with Adalimumab + Methotrexate Significantly Improved Work Ability, Physical Function, Fatigue, and Other Patient-Reported Outcomes in Early Rheumatoid Arthritis: Results From a 26-Week Analysis [abstract]. *Arthritis Rheum* 2011; 63(Suppl 10):2189.
- (23) Maksymowych WP, Rao S, Boonen A, Chen N, Cifaldi M. Validation of the patient acceptable work state (PAWS): Establishing thresholds for major work transition in ankylosing spondylitis [abstract]. *Arthritis Rheum* 2010; 62(Suppl 10):557.
- (24) Hazes JM, Taylor P, Strand V, Purcaru O, Coteur G, Mease P. Physical function improvements and relief from fatigue and pain are associated with increased productivity at work and at home in rheumatoid arthritis patients treated with certolizumab pegol. *Rheumatology (Oxford)* 2010; 49(10):1900-10.
- (25) Beaton DE, Tang K, Gignac MA, Lacaille D, Badley EM, Anis AH et al. Reliability, validity, and responsiveness of five at-work productivity measures in patients with rheumatoid arthritis or osteoarthritis. *Arthritis Care Res* 2010; 62(1):28-37.
- (26) Kessler RC, Ames M, Hymel PA, Loeppke R, McKenas DK, Richling DE et al. Using the World Health Organization Health and Work Performance Questionnaire (HPQ) to evaluate the indirect workplace costs of illness. *J Occup Environ Med* 2004; 46(6 Suppl):S23-S37.
- (27) Kessler RC, Barber C, Beck A, Berglund P, Cleary PD, McKenas D et al. The World Health Organization Health and Work Performance Questionnaire (HPQ). *J Occup Environ Med* 2003; 45(2):156-74.
- (28) Kessler RC, Petukhova M, McInnes K. HPQ Short Form (Absenteeism and Presenteeism Questions and Scoring Rules) (2007). From: <http://www.hcp.med.harvard.edu/hpq/ftpd/absenteeism%20presenteeism%20scoring%20050107.pdf>. Accessed September 24, 2012.
- (29) Brouwer WB, Koopmanschap MA, Rutten FF. Productivity losses without absence: measurement validation and empirical evidence. *Health Policy* 1999; 48(1):13-27.

Online supplement to: Worker Productivity Outcome Measures: OMERACT Filter Evidence and Agenda for Future Research

doi:10.3899/jrheum.130815

- (30) Tuomi K, Ilmarinen J, Jahkola A, Katajarinne L, Tulkki A. Work Ability Index, 2nd revised edn. Finnish Institute of Occupational Health: Helsinki 1998.
- (31) Kuijer PP, Gouttebauge V, Wind H, van DC, Sluiter JK, Frings-Dresen MH. Prognostic value of self-reported work ability and performance-based lifting tests for sustainable return to work among construction workers. *Scand J Work Environ Health* 2012; Epub ahead of print.
- (32) de Croon EM, Sluiter JK, Nijssen TF, Kammeijer M, Dijkmans BA, Lankhorst GJ et al. Work ability of Dutch employees with rheumatoid arthritis. *Scand J Rheumatol* 2005; 34(4):277-83.
- (33) Sluiter JK, Frings-Dresen MH. Quality of life and illness perception in working and sick-listed chronic RSI patients. *Int Arch Occup Environ Health* 2008; 81(4):495-501.
- (34) Herenius MMJ, Hoving JL, Sluiter JK, Raterman HG, Lems WF, Dijkmans BAC et al. Improvement of work ability, quality of life, and fatigue in patients with rheumatoid arthritis treated with adalimumab. *J Occup Environ Med* 2010; 52(6):618-21.
- (35) Hoving JL, Bartelds GM, Sluiter JK, Sadiraj K, Groot I, Lems WF et al. Perceived work ability, quality of life, and fatigue in patients with rheumatoid arthritis after a 6-month course of TNF inhibitors: prospective intervention study and partial economic evaluation. *Scand J Rheumatol* 2009; 38(4):246-50.
- (36) de Vries HJ, Reneman MF, Groothoff JW, Geertzen JH, Brouwer S. Self-reported Work Ability and Work Performance in Workers with Chronic Nonspecific Musculoskeletal Pain. *J Occup Rehabil* 2012; Epub ahead of print.
- (37) Wahlin C, Ekberg K, Persson J, Bernfort L, Oberg B. Evaluation of self-reported work ability and usefulness of interventions among sick-listed patients. *J Occup Rehabil* 2012; Epub ahead of print.
- (38) Tang K, Beaton DE, Lacaille D, Gignac MA, Bombardier C. Sensibility of five at-work productivity measures was endorsed by patients with osteoarthritis or rheumatoid arthritis. *J Clin Epidemiol* 2013; 66(5):546-56.
- (39) Gignac MA, Sutton D, Badley EM. Arthritis symptoms, the work environment, and the future: measuring perceived job strain among employed persons with arthritis. *Arthritis Rheum* 2007; 57(5):738-47.
- (40) Gignac MA, Cao X, Tang K, Beaton DE. Examination of arthritis-related work place activity limitations and intermittent disability over four-and-a-half years and its relationship to job modifications and outcomes. *Arthritis Care Res (Hoboken)* 2011; 63(7):953-62.

Online supplement to: Worker Productivity Outcome Measures: OMERACT Filter Evidence and Agenda for Future Research

doi:10.3899/jrheum.130815

- (41) Gignac MA, Badley EM, Lacaille D, Cott CC, Adam P, Anis AH. Managing arthritis and employment: making arthritis-related work changes as a means of adaptation. *Arthritis Rheum* 2004; 51(6):909-16.
- (42) Gignac MA. Arthritis and employment: an examination of behavioral coping efforts to manage workplace activity limitations. *Arthritis Rheum* 2005; 53(3):328-36.
- (43) Gignac MA, Sutton D, Badley EM. Reexamining the arthritis-employment interface: perceptions of arthritis-work spillover among employed adults. *Arthritis Rheum* 2006; 55(2):233-40.
- (44) Lerner D, Amick BC, III, Rogers WH, Malspeis S, Bungay K, Cynn D. The Work Limitations Questionnaire. *Med Care* 2001; 39(1):72-85.
- (45) Abma FI, van der Klink JJJ, Terwee CB, Amick III BC, Bültmann U. Evaluation of the measurement properties of self-reported health-related work-functioning instruments among workers with common mental disorders. *Scand J Work Environ Health* 2012; 38(1):5-18.
- (46) Walker N, Michaud K, Wolfe F. Work limitations among working persons with rheumatoid arthritis: results, reliability, and validity of the work limitations questionnaire in 836 patients. *J Rheumatol* 2005; 32(6):1006-12.
- (47) Roy JS, MacDermid JC, Amick BC, III, Shannon HS, McMurtry R, Roth JH et al. Validity and responsiveness of presenteeism scales in chronic work-related upper-extremity disorders. *Phys Ther* 2011; 91(2):254-66.
- (48) Zhang W, Gignac MA, Beaton D, Tang K, Anis AH. Productivity loss due to presenteeism among patients with arthritis: estimates from 4 instruments. *J Rheumatol* 2010; 37(9):1805-14.
- (49) Lerner D, Reed JI, Massarotti E, Wester LM, Burke TA. The Work Limitations Questionnaire's validity and reliability among patients with osteoarthritis. *J Clin Epidemiol* 2002; 55(2):197-208.

Online supplement to: Worker Productivity Outcome Measures: OMERACT Filter Evidence and Agenda for Future Research

doi:10.3899/jrheum.130815
